# Supplementary material for: RNA fusion in human retinal development
Source: eLife journal article supplement (doi:10.7554/elife.92523), 2024-01-02

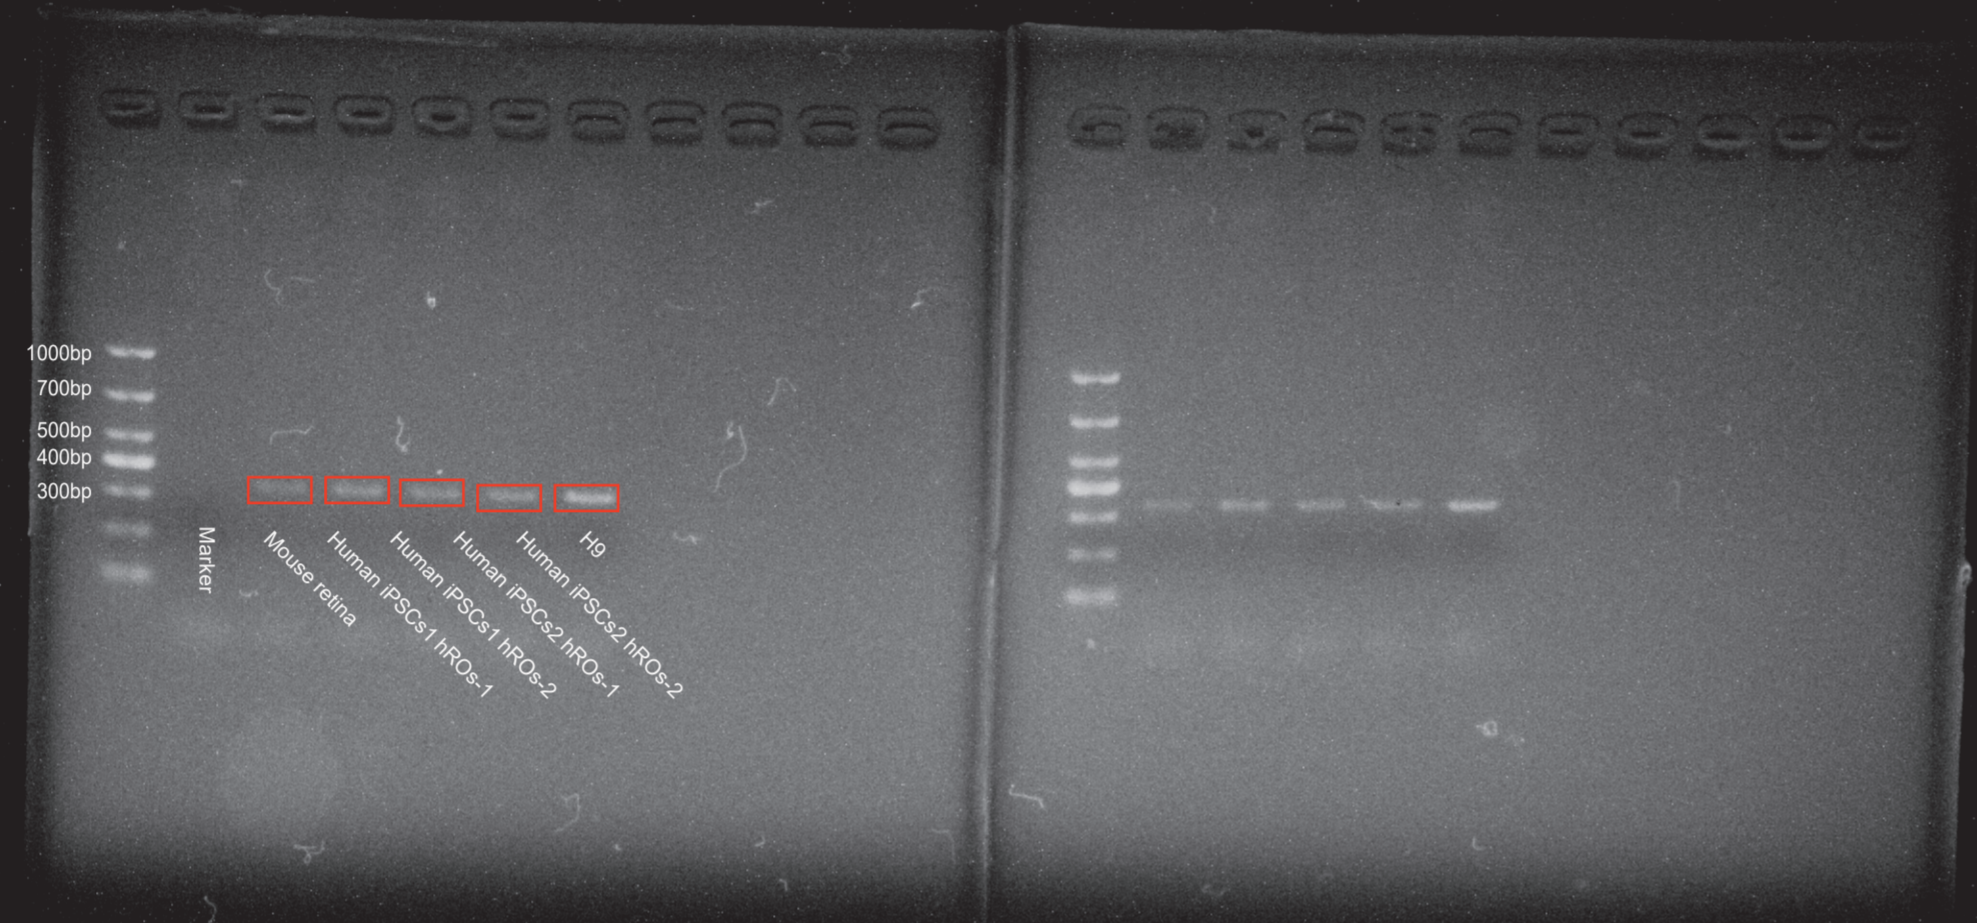

Supplement: fig5-data2 [file elife-92523-fig5-data2-v3.pdf]
